# Supplementary material for: Dipolar Order Parameters in Large Systems With Fast Spinning
Source: Frontiers journal article supplement (doi:10.3389/fmolb.2021.791026), 2021-12-09
Supplement: Data_Sheet_1.zip [file Data_Sheet_1.zip]

Table S6. The following variable flip angle R-Symmetry elements were tested in Simpson. . Red arrows represent the first portion of the composite pulse t1. t2 is the second portion, in blue. t3 is the third portion in yellow. t4 is the third portion in black. t5 is the fifth portion in gray.

| R-element |  |  | kp (B1=kprN/2n) | 1,2,3… •­ (2rn/N) |
| --- | --- | --- | --- | --- |
|  | 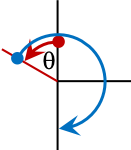 | 1a |  | 1=   2=  |
|  | 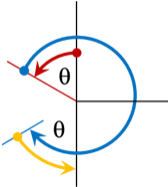 | 2a |  | 1=   2=   3=  |
|  | 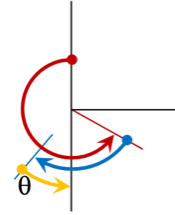 | 2b |  | 1=   2=   3=  |
|  | 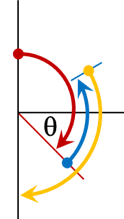 | 2c |  | 1=   2=   3=  |
|  | 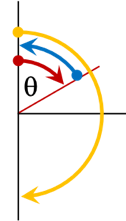 | 2d |  | 1=   2=   3=  |
|  | 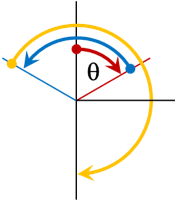 | 2e |  | 1=   2=   3=  |
|  | 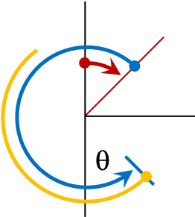 | 2f |  | 1=   2=   3=  |
|  | 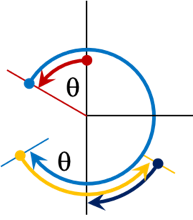 | 3a |  | 1=   2=   3=   4=  |
|  | 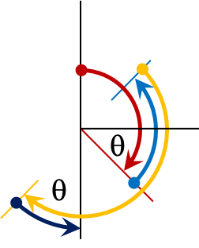 | 3b |  | 1=   2=   3=   4=  |
|  | 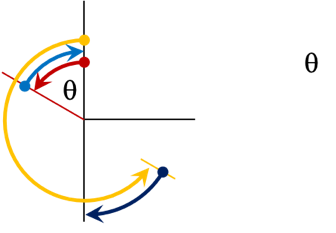 | 3c |  | 1=   2=   3=   4=  |
|  | 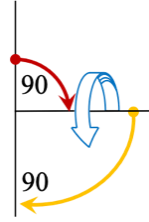 | 4a |  | 1=   2=   3= ( |
|  | 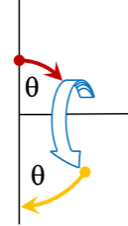 | 4b |  | 1=   2=   3= ( |
|  | 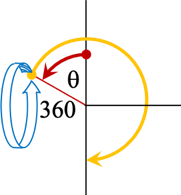 | 5a |  | 1=   2=   3= ( |
|  | 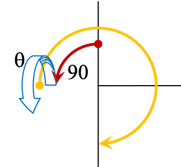 | 5b |  | 1=   2=   3= ( |
|  | 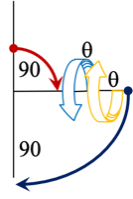 | 6a |  | 1=   2=   3= (  4= ( |
|  | 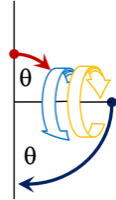 | 6b |  | 1=   2=   3= (  4= ( |
|  | 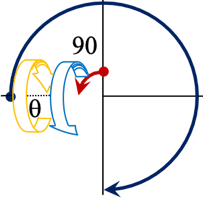 | 7a |  | 1=   2=   3= (  4= ( |
|  | 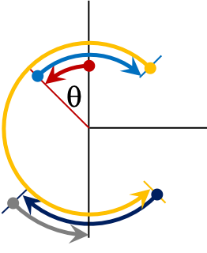 | 8a |  | 1=   2=   3=   4=   5=  |
|  | 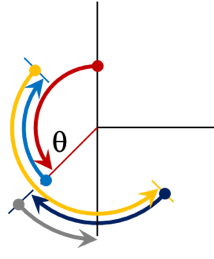 | 8b |  | 1=   2=   3=   4=   5=  |
|  | 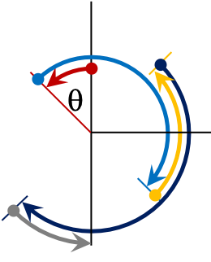 | 8c |  | 1=   2=   3=   4=   5=  |
|  | 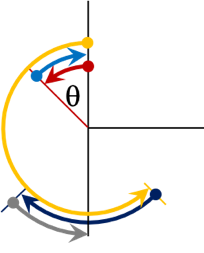 | 8d |  | 1=   2=   3=   4=   5=  |
|  | 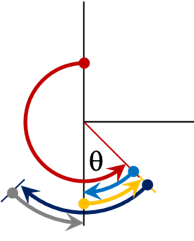 | 8e |  | 1=   2=   3=   4=   5=  |
