# Supplementary figures and images for: Dipolar Order Parameters in Large Systems With Fast Spinning
Source: Frontiers journal article supplement (doi:10.3389/fmolb.2021.791026), 2021-12-09

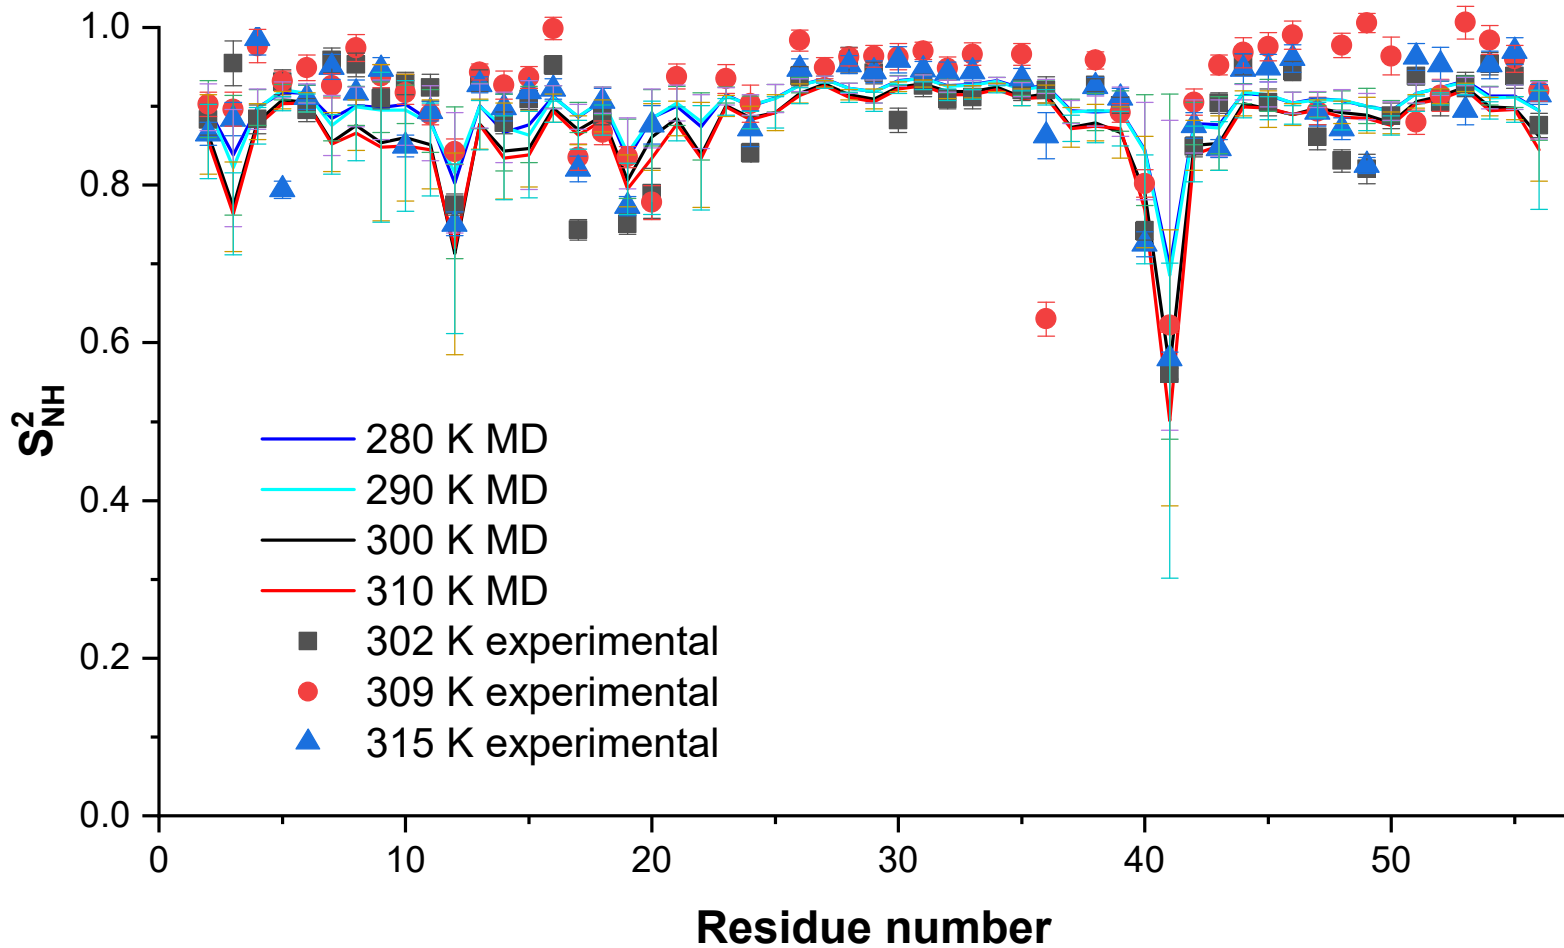

Supplement: Data_Sheet_1.zip [file Data_Sheet_1.zip]
